# Supplementary material
Source: PubMed Central journal article supplement (PMC4169888)
Supplement: NIHMS482602-supplement-01.pdf [file NIHMS482602-supplement-01.pdf]

# Prostate MRI Procedure Survey

## 1. Do you perform prostate MRI at your institution?

- Yes
- No

## 2. Name of institution (to evaluate for duplicate answers from institutions)

## 3. How do you describe your institution?

- Academic
- Large private practice
- Community group

## 4. How many prostate MRI studies do you perform per month?

- <1
- 1-5
- 6-10
- 11-20
- 21-40
- 41-100
- > 100

## 5. How long have you performed prostate MRI?

- < 5 years
- 6-10 yrs
- 11-15 yrs
- 15 + years

## 6. What field strength do you most commonly perform prostate MRI?

- < 1.0 T
- 1.0 T
- 1.5 T
- 3.0 T
- > 3.0 T

# Prostate MRI Procedure Survey

## 7. Do you usually perform prostate MRI with an endorectal coil?

- Yes
- No

## 8. Which sequences do you typically perform?

- T1 axial
- T1 sagittal
- T1 coronal
- T2 axial
- T2 sagittal
- T2 coronal
- Diffusion weighted imaging
- Diffusion tensor imaging
- Dynamic contrast enhancement
- Magnetic resonance spectroscopy

Other (please specify)

## 9. How many radiologists will read prostate MRI at your institution?

Approximate Number:

## 10. How many total radiologists read body MRI are at your institution?

Approximate Number:

## 11. Do you have the ability to biopsy prostate lesions by MRI guidance or by MRI-Ultrasound fusion?

- Yes - MRI Guidance
- Yes - MRI/US Fusion
- Yes - Both
- No

## 12. Do you use sedation for prostate MRI examinations?

- Yes
- No

# Prostate MRI Procedure Survey

## 13. Common indications for prostate MRI referrals at your institution?

- Prostate Cancer Staging
- Elevated PSA with prior negative biopsy
- Active Surveillance monitoring
- Surgical Planning
- Radiation Therapy Planning
- Prostate Cancer recurrence after therapy

Other (please specify)
